# Supplementary material for: Divergent evolution of male-determining loci on proto-Y chromosomes of the housefly
Source: PubMed Central journal article supplement (PMC11252125; doi:10.1038/s41467-024-50390-1), 2024-07-16
Supplement: 41467_2024_50390_MOESM1_ESM.pdf [file 41467_2024_50390_MOESM1_ESM.pdf]

**Supplementary Table 1** Overview statistics of the M3, M5 and *aabys*-male genomes in comparison with published *aabys* genome

| Genome                                            | <i>aabys</i>   | <i>aabys</i> -male | M3             | M5             |
|---------------------------------------------------|----------------|--------------------|----------------|----------------|
| <b>Total length (bp)</b>                          | 750,403,944    | 893,747,508        | 1,318,800,909  | 1,333,442,172  |
| <b>Contig number</b>                              | 20,487         | 18,213             | 11,176         | 4,327          |
| <b>Largest Contig/Scaffold</b>                    | 2,348,962      | 454,643            | 12,933,002     | 37,055,696     |
| <b>Contig number (<math>\geq 10000</math> bp)</b> | 6,714          | 16,975             | 10,169         | 10195          |
| <b>GC (%)</b>                                     | 35.11          | 35.99              | 35.16          | 34.78          |
| <b>N50</b>                                        | 226,573        | 63,778             | 617,562        | 7,800,370      |
| <b>N75</b>                                        | 82,880         | 40,079             | 172,126        | 1,980,037      |
| <b>L50</b>                                        | 809            | 4,206              | 471            | 47             |
| <b>L75</b>                                        | 2,176          | 8,651              | 1,468          | 134            |
| <b>BUSCO score*</b>                               | C:96.5% (3172) | C:80.4% (2642)     | C:98.9% (3249) | C:99.2% (3258) |
|                                                   | S:95.5% (3138) | S:79.1% (2600)     | S:58.2% (1911) | S:69.8% (2292) |
|                                                   | D:1.0% (34)    | D:1.3% (42)        | D:40.7% (1338) | D:29.4% (966)  |
|                                                   | F:1.7% (56)    | F:4.8% (158)       | F:0.5% (17)    | F:0.3% (10)    |
|                                                   | M:1.8% (57)    | M:14.8% (485)      | M:0.6% (19)    | M:0.5% (17)    |

\* Total BUSCO groups searched: 3285 (Universal protein-coding genes in dipteran lineages). C: Complete BUSCOs; S: Complete and single-copy BUSCOs; D: Complete and duplicated BUSCOs; F: Fragmented BUSCOs; M: Missing BUSCOs.

**Supplementary Table 2** BLAST results of aligning *Mdmd* and *Mdnem* ORF sequences to the 4 contigs in the M3 genome, 2 contigs in the M5 genome and 5 contigs in the *aabys*-male genome that contain *Mdmd*-like sequences

| Subject              | Query                 | Genome             | Subject length (bp) | Max score                       | Total score | E-value   | Identity (%) |       |
|----------------------|-----------------------|--------------------|---------------------|---------------------------------|-------------|-----------|--------------|-------|
| <i>Mdmd</i><br>(ORF) | Contig6762            | M3                 | 3759                | 3077                            | 39190       | 0         | 97.05        |       |
|                      | Contig7871            |                    | 3759                | 3544                            | 1.537e+05   | 0         | 100          |       |
|                      | Contig624             |                    | 3759                | 939                             | 1682        | 0         | 85.42        |       |
|                      | Contig5307            |                    | 3759                | 961                             | 1715        | 0         | 85.86        |       |
|                      | tig00004758           | M5                 | 3759                | 3517                            | 13804       | 0         | 99.74        |       |
|                      | tig00000533           |                    | 3759                | 939                             | 1699        | 0         | 85.42        |       |
|                      | contig_6317_pilon     | <i>aabys</i> -male | 3759                | 483                             | 2215        | 8.00E-138 | 88.75        |       |
|                      | contig_2268_pilon     |                    | 3759                | 3099                            | 11939       | 0         | 97.27        |       |
|                      | contig_2269_pilon     |                    | 3759                | 2787                            | 18072       | 0         | 96.37        |       |
|                      | contig_12930_pilon    |                    | 3759                | 3506                            | 8652        | 0         | 99.64        |       |
|                      | contig_12873_pilon    |                    | 3759                | 760                             | 760         | 0         | 83.43        |       |
|                      | <i>Mdnem</i><br>(ORF) | Contig6762         | M3                  | 3510                            | 749         | 4261      | 0            | 83.07 |
| Contig7871           |                       | 3510               |                     | 749                             | 19542       | 0         | 83.07        |       |
| Contig624            |                       | 3510               |                     | 3363                            | 6035        | 0         | 97.89        |       |
| Contig5307           |                       | 3510               |                     | 3469                            | 6074        | 0         | 98.87        |       |
| tig00004758          |                       | M5                 | 3510                | 743                             | 1486        | 0         | 82.95        |       |
| tig00000533          |                       |                    | 3510                | 3469                            | 6212        | 0         | 98.87        |       |
| contig_6317_pilon    |                       | <i>aabys</i> -male | 3510                | No significant similarity found |             |           |              |       |
| contig_2268_pilon    |                       |                    | 3510                | 754                             | 1437        | 0         | 83.19        |       |
| contig_2269_pilon    |                       |                    | 3510                | 747                             | 2484        | 0         | 83.09        |       |
| contig_12930_pilon   |                       |                    | 3510                | 686                             | 686         | 0         | 81.77        |       |
| contig_12873_pilon   | 3510                  |                    | 3533                | 6664                            | 0           | 99.48     |              |       |

**Supplementary Table 3** BLAST results of matches for partial replicates of predicted genes in the *M<sup>III</sup>*-contigs and against M3 genome and with the best match

| Description                                                                     | Sequence length (bp) | Accession No.  | Contig No.                       | Max score | Total score | Query cover | E value   | Per. ident |
|---------------------------------------------------------------------------------|----------------------|----------------|----------------------------------|-----------|-------------|-------------|-----------|------------|
| <i>ribose-phosphate pyrophosphokinase 1</i>                                     | 2272                 | XM_005183825.3 | <i>M<sup>III</sup></i> -contig-1 | 985       | 3226        | 41%         | 0         | 93.87%     |
|                                                                                 |                      |                | 2374                             | 1375      | 4020        | 94%         | 0         | 99.60%     |
| <i>cytochrome P450 6D3 (CYP6D3)</i>                                             | 14009                | AF200191.1     | <i>M<sup>III</sup></i> -contig-1 | 723       | 8159        | 13%         | 0         | 86.33%     |
|                                                                                 |                      |                | <i>M<sup>III</sup></i> -contig-2 | 643       | 8372        | 11%         | 0         | 87.19%     |
| <i>Musca domestica 60S ribosomal protein L22-like</i>                           | 595                  | XM_011296757.1 | 7484                             | 3722      | 1.19E+05    | 89%         | 0         | 98.49%     |
|                                                                                 |                      |                | <i>M<sup>III</sup></i> -contig-1 | 560       | 844         | 93%         | 2.00E-161 | 96.47%     |
| <i>Musca domestica putative protein TPRXL</i>                                   | 790                  | XM_005189509.1 | <i>M<sup>III</sup></i> -contig-2 | 440       | 779         | 53%         | 5.00E-125 | 91.56%     |
|                                                                                 |                      |                | 4724                             | 1074      | 1074        | 100%        | 0         | 99.16%     |
| <i>alpha-1,3-mannosyl-glycoprotein 4-beta-N-acetylglucosaminyltransferase A</i> | 6282                 | XM_020038408.1 | <i>M<sup>III</sup></i> -contig-1 | 507       | 1751        | 100%        | 3.00E-145 | 88.14%     |
|                                                                                 |                      |                | <i>M<sup>III</sup></i> -contig-2 | 368       | 654         | 31%         | 3.00E-103 | 93.52%     |
| <i>putative mediator of RNA polymerase II transcription subunit 26</i>          | 12199                | XM_020039898.1 | 9512                             | 782       | 1711        | 100%        | 0         | 100.00%    |
|                                                                                 |                      |                | <i>M<sup>III</sup></i> -contig-1 | 394       | 497         | 7%          | 2.00E-110 | 84.50%     |
| <i>DNA topoisomerase I, mitochondrial-like</i>                                  | 895                  | XM_020039943.1 | <i>M<sup>III</sup></i> -contig-2 | 442       | 1740        | 7%          | 2.00E-124 | 84.28%     |
|                                                                                 |                      |                | 2611                             | 3238      | 18076       | 99%         | 0         | 93.15%     |
| <i>defensin-1 mRNA</i>                                                          | 1012                 | KC920907.1     | <i>M<sup>III</sup></i> -contig-1 | 361       | 498         | 3%          | 5.00E-100 | 86.31%     |
|                                                                                 |                      |                | 37                               | 13732     | 25446       | 99%         | 0         | 96.88%     |
| <i>protein sax-3</i>                                                            | 6577                 | XM_020036366.1 | <i>M<sup>III</sup></i> -contig-1 | 283       | 2906        | 63%         | 7.00E-78  | 89.95%     |
|                                                                                 |                      |                | 2844                             | 1568      | 1795        | 100%        | 0         | 98.33%     |
| <i>putative uncharacterized transmembrane protein DDB_G0293652</i>              | 1677                 | XM_020039173.1 | <i>M<sup>III</sup></i> -contig-1 | 141       | 266         | 13%         | 5.00E-35  | 86.57%     |
|                                                                                 |                      |                | 3896                             | 1683      | 1979        | 97%         | 0         | 97.38%     |
| <i>Transcription elongation factor SPT6-like</i>                                | 3405                 | XM_020034885.1 | <i>M<sup>III</sup></i> -contig-1 | 137       | 229         | 1%          | 4.00E-33  | 89.72%     |
|                                                                                 |                      |                | 960                              | 3650      | 10509       | 92%         | 0         | 97.15%     |
| <i>ATP-dependent Clp protease proteolytic subunit, mitochondrial</i>            | 1565                 | XM_005189536.3 | <i>M<sup>III</sup></i> -contig-2 | 1229      | 4488        | 100%        | 0         | 93.50%     |
|                                                                                 |                      |                | 619                              | 3009      | 4064        | 100%        | 0         | 99.05%     |
| <i>transposon MdmaT1a nonfunctional transposase</i>                             | 961                  | AF315724.1     | <i>M<sup>III</sup></i> -contig-2 | 1171      | 7704        | 54%         | 0         | 92.24%     |
|                                                                                 |                      |                | 3766                             | 4063      | 19462       | 100%        | 0         | 97.39%     |
| <i>ABC membrane transporter (white)</i>                                         | 2180                 | AY055821.1     | <i>M<sup>III</sup></i> -contig-2 | 913       | 2190        | 48%         | 0         | 93.10%     |
|                                                                                 |                      |                | 6518                             | 2658      | 9303        | 100%        | 0         | 99.86%     |
| <i>protein prickle</i>                                                          | 7369                 | XM_020035464.1 | <i>M<sup>III</sup></i> -contig-2 | 869       | 869         | 84%         | 0         | 85.94%     |
|                                                                                 |                      |                | 10355                            | 1099      | 37845       | 91%         | 0         | 91.05%     |
| <i>clock protein period</i>                                                     | 6573                 | AH007818.2     | <i>M<sup>III</sup></i> -contig-2 | 496       | 496         | 18%         | 4.00E-141 | 89.57%     |
|                                                                                 |                      |                | 1321                             | 1094      | 66494       | 100%        | 0         | 83.43%     |
| <i>partial bcd gene for bicoid protein</i>                                      | 1293                 | AJ297850.1     | <i>M<sup>III</sup></i> -contig-2 | 350       | 700         | 2%          | 1.00E-96  | 97.56%     |
|                                                                                 |                      |                | 5687                             | 3980      | 12146       | 95%         | 0         | 97.91%     |
|                                                                                 |                      |                | <i>M<sup>III</sup></i> -contig-2 | 344       | 569         | 8%          | 5.00E-95  | 82.11%     |
|                                                                                 |                      |                | 1194                             | 8026      | 86233       | 93%         | 0         | 97.61%     |
|                                                                                 |                      |                | <i>M<sup>III</sup></i> -contig-2 | 185       | 185         | 36%         | 6.00E-48  | 74.40%     |
|                                                                                 |                      |                | 10701                            | 1434      | 3587        | 99%         | 0         | 97.95%     |

**Supplementary Table 4** Overview of the repeat sequences in the  $M^{III}$ -contigs

| Contig              | Class                       | Type              | Num | Sum |
|---------------------|-----------------------------|-------------------|-----|-----|
| $M^{III}$ -contig-1 | Class I<br>Retrotransposon  | LINE/CR1          | 1   | 94  |
|                     |                             | LINE/I-Jockey     | 9   |     |
|                     |                             | LINE/R1-LOA       | 19  |     |
|                     |                             | LINE/RTE-BovB     | 1   |     |
|                     |                             | LTR/Copia         | 3   |     |
|                     |                             | LTR/Gypsy         | 26  |     |
|                     |                             | LTR/Pao           | 35  |     |
|                     | Class II<br>DNA transposons | DNA/CMC-EnSpm     | 3   | 42  |
|                     |                             | DNA/hAT-Blackjack | 3   |     |
|                     |                             | DNA/TcMar-Tc1     | 11  |     |
|                     |                             | RC/Helitron       | 25  |     |
|                     |                             | Low_complexity    | 4   |     |
|                     |                             | Simple_repeat     | 43  |     |
|                     |                             | Unknown           | 145 |     |
| $M^{III}$ -contig-2 | Class I<br>Retrotransposon  | LINE/CR1          | 24  | 141 |
|                     |                             | LINE/I-Jockey     | 12  |     |
|                     |                             | LINE/Penelope     | 20  |     |
|                     |                             | LINE/R1-LOA       | 48  |     |
|                     |                             | LINE/RTE-BovB     | 2   |     |
|                     |                             | LTR/Gypsy         | 23  |     |
|                     |                             | LTR/Pao           | 12  |     |
|                     | Class II<br>DNA transposons | DNA/CMC-EnSpm     | 1   | 55  |
|                     |                             | DNA/TcMar-Tc1     | 17  |     |
|                     |                             | RC/Helitron       | 37  |     |
|                     |                             | Low_complexity    | 9   |     |
|                     | Simple_repeat               | 42                |     |     |
|                     | Unknown                     | 297               |     |     |

**Supplementary Table 5** Positions where SNPs are found in intact *Mdmd* gene from  $M^I$ ,  $M^{III}$ ,  $M^V$ , and  $M^Y$

| Position  | 310 | 512 | 527 | 1020 | 1184 | 1596 | 1712 | 1722 | 1765 | 1853 | 1997 | 2040 | 2671 | 2683 | 2942 | 3093 | 3257 | 3272 | 3282 | 3425 | Total |
|-----------|-----|-----|-----|------|------|------|------|------|------|------|------|------|------|------|------|------|------|------|------|------|-------|
| $M^I$     | A   | C   | A   | G    | C    | T    | G    | T    | A    | G    | T    | G    | A    | A    | G    | C    | G    | C    | T    | T    | 4     |
| $M^{III}$ | A   | A   | A   | A    | C    | C    | A    | C    | G    | T    | C    | G    | A    | T    | A    | T    | G    | C    | C    | T    | 8     |
| $M^V A$   | A   | A   | G   | G    | C    | T    | A    | T    | A    | G    | T    | G    | A    | A    | G    | T    | G    | C    | C    | T    | 1     |
| $M^V B$   | A   | A   | G   | G    | C    | T    | A    | T    | A    | G    | T    | A    | A    | A    | G    | T    | G    | C    | C    | T    | 2     |
| $M^Y$     | G   | A   | A   | G    | A    | T    | A    | T    | A    | G    | T    | G    | G    | A    | G    | T    | A    | G    | C    | C    | 6     |
| Consensus | A   | A   | A   | G    | C    | T    | A    | T    | A    | G    | T    | G    | A    | A    | G    | T    | G    | C    | C    | T    |       |

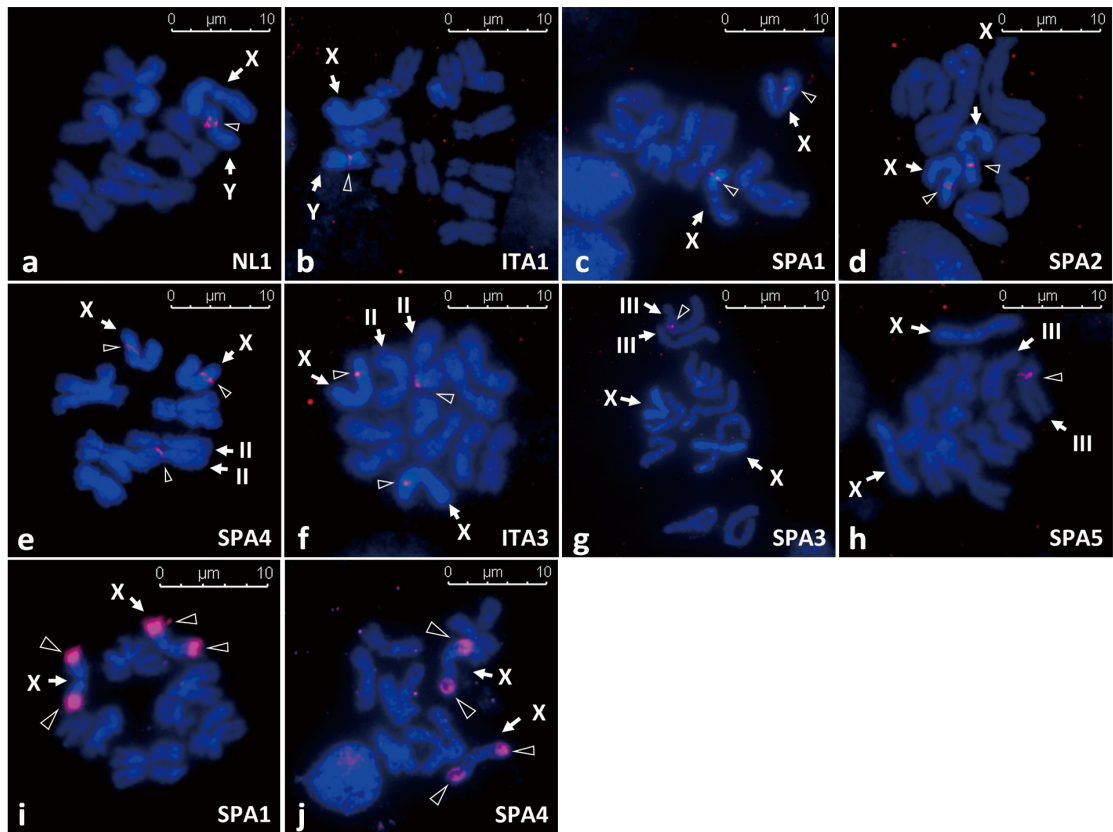

**Supplementary Fig. 1** FISH localization using *Mmdm*-specific probe and Mix probe in samples from various geographic strains. *Mmdm*-specific probe resulted in localization of *M* loci on the Y chromosome (a, b), the X chromosome (c, d, e, f), chromosome II (e, f) and chromosome III (g, h).  $M^X$ ,  $M^{II}$  and  $M^{III}$  all showed pericentromeric location on the short arms of each chromosome.  $M^X$  was located in the middle of one arm of the X chromosome. Particularly, homozygous  $M^X$  are observed because of the existence of *tra<sup>D</sup>*, a dominant variant of *transformer* gene. *tra<sup>D</sup>* directs female development regardless of the presence of *M*, and thus, allows both males and females to carry *M* (for details see ref<sup>20</sup>). Mix probe was applied to the SPA1 (i) and SPA4 (j) samples. The results show co-localization of MAS repeats and  $M^X$ . The  $M^X$  signals are inseparable from the signals of MAS repeats signals indicating the adjacency of the two. Positive signals are shown in red and indicated by open triangles, chromosomes are indicated by arrows. Mitotic chromosomes are shown in blue. Signals were only considered as a successful hybridization if they were observed with consistent chromosomal locations on at least 20 metaphase nuclei on each slide. For each strain, 2-3 individuals were tested to ensure reproducibility.

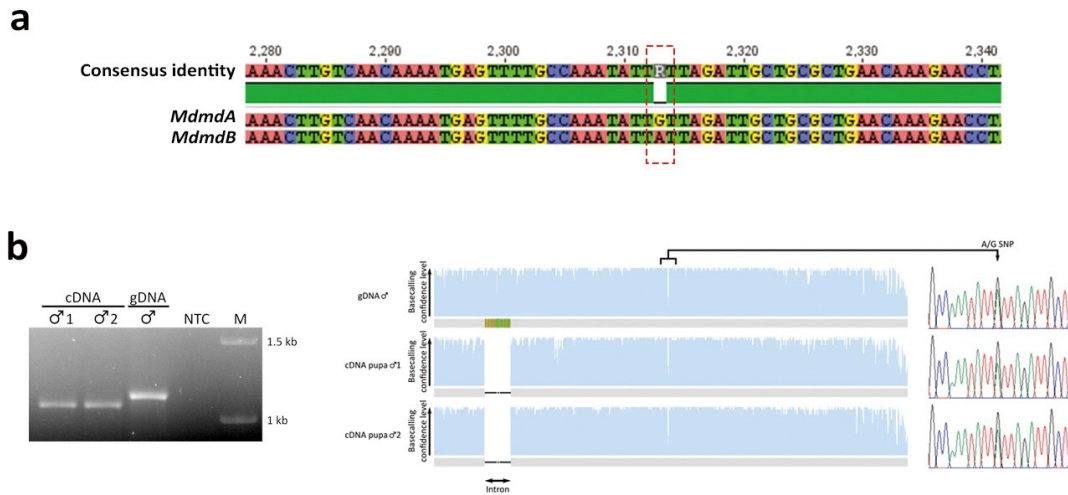

**Supplementary Fig. 2** Genomic sequence alignment and transcripts of the *Mdma* copies in *M<sup>V</sup>*. **a:** Only one nucleotide substitution (indicated by the dashed line box) is found between the two *Mdma* copies. **b:** PCR amplification of *Mdma* fragments using cDNA of two M5 male samples. The amplified fragments from the cDNA are shorter than that of the gDNA as the *Mdma* transcripts do not contain the intron. NTC: control. M: ladder. Upon Sanger sequencing, base-calling sequencing electropherogram shows that in both gDNA and cDNA fragments, a double peak representing G and A exist at the SNP location. This demonstrates that both *MdmaA* and *MdmaB* transcribe.

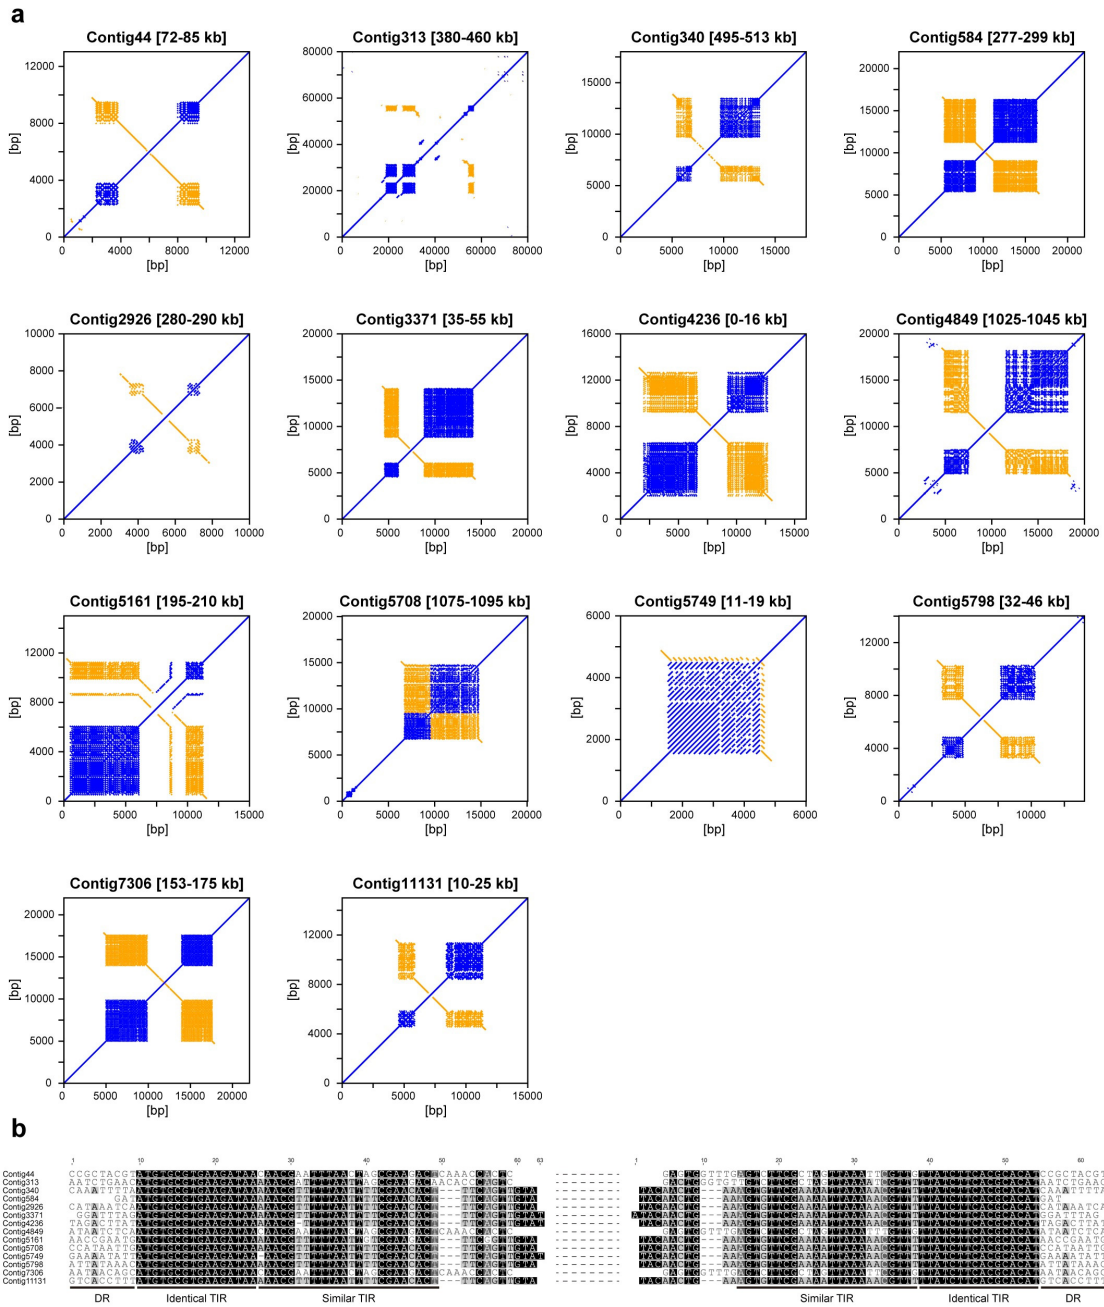

**Supplementary Fig. 3** Examples of genomic regions that show similar structures to  $M^V$  and contain identical Terminal Inverted Repeats (TIR). **a**: Self-alignment visualizations of 14 genomic regions containing the same interspersed tandem repeat blocks and TIRs as  $M^V$ .  $M^V$ -like palindromic structures are observed in all of them. The matched sequences are shown in blue (with the same orientation) and orange (with the reverse orientation). The wordsize used for similarity search was set to 50. **b**: All examined palindromic regions contain identical TIRs. Flanking those TIRs are direct repeats (DRs) that are mostly 9 bp (12 out of 14 examined regions) but differ in sequence contents.



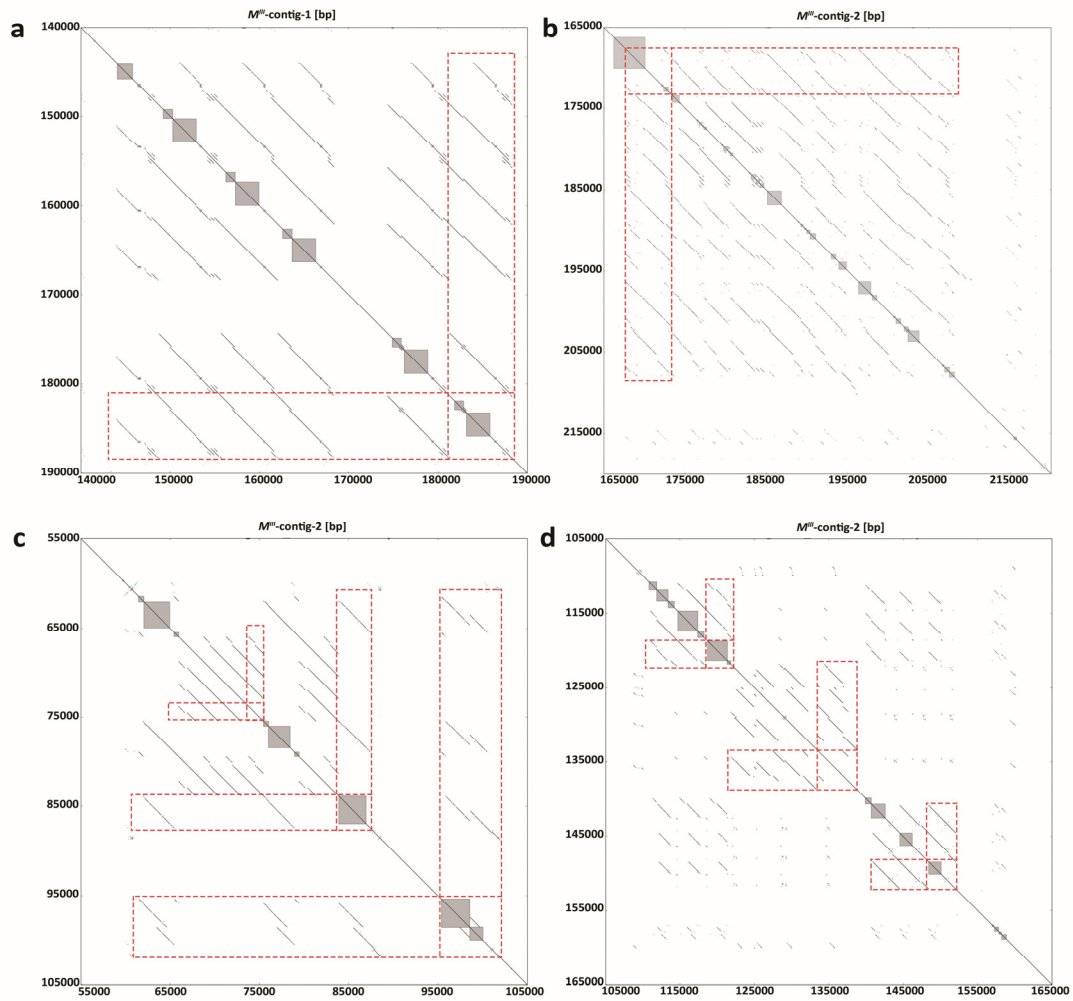

**Supplementary Fig. 4** Self-alignment visualization of 4 examples of duplicated regions on the  $M^{III}$ -contigs. The grey squares represent the  $Mdmd$  sequences. The red dashed line boxes indicate the duplicated unit. The duplicated unit vary in length and range as it can be  $Mdmd$  with its upstream and downstream sequences (a), partial  $Mdmd$  sequences with its downstream sequences (b), or only  $Mdmd$  flanking sequences (c, d). The wordsize used for similarity search was set to 25.

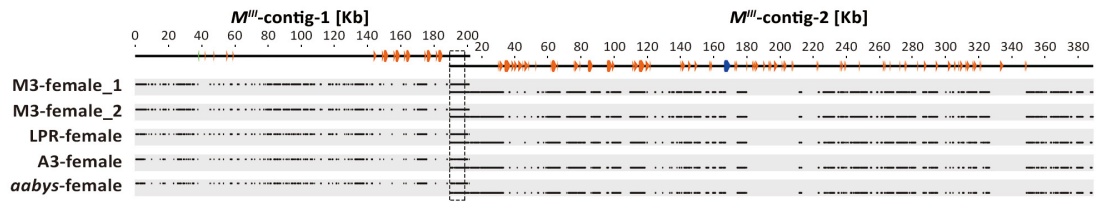

**Supplementary Fig. 5** The coverage in five female genomic datasets of the  $M^{III}$ -contigs. The similarity to the  $M^{III}$ -contigs for each dataset is represented by a horizontal line consisting of individual dots that indicate sufficient coverage. The lack of similarity is visible by the absence of dots and thus a discontinuous line. Unmapped parts indicate  $M^{III}$ -specific sequences, which disperse over the  $M^{III}$ -contigs. All five replicates showed comparable coverage patterns. The schematic drawing of  $M^{III}$ -contigs on the top show the distribution of  $Mdmd$  sequences, wherein the fragmented replicates are represented by orange (sense order) or green (antisense order) triangles. The complete  $Mdmd$  genes are represented by blue triangles. The dashed line box indicates the part where the two  $M^{III}$ -contigs share high homology.

## Supplementary Discussion

### Identification of DSB/homologous repair traces in $M^{III}$ tandem duplications

Fiston-Lavier *et al.* (2007) described a particular case of tandem duplication formation via re-invasion process during double-strand break/homologous repair mechanism. Several sequence traces are expected to exist as a result. For instance: 1. The pairwise alignment of the template sequence and the sequences with the tandem duplication would exhibit a gap on the template. 2. Repeats are strictly in tandem within the newly synthesized sequence. 3. Homologous fragments should be detected between the template and each copy of the duplication. We examined a duplicated region on one  $M^{III}$ -contigs to see if we could find such traces. We focused on the 170-190 kb region on  $M^{III}$ -contig-2 as this is  $M^{III}$ -specific and is considered to have recently originated after the translocation from the Y to autosome III. Sequence traces are thus less likely lost because of degeneration.

We found one region at approximately 183-185 kb on  $M^{III}$ -contig-2 (duplicated sequence, referred to as DS) representing replication of the sequence at approximately 170-173.5 kb (template sequence, referred to as TS). Unlike the TS, the DS contains one fragment that replicated twice, thereby resulting in a total of three tandem copies (fig. S6). By examining pairwise alignment between TS and DS, microhomology traces were observed in both TS and DS. One trace directly flanked the gap in TS, whereas two are located at the end of additional duplications in DS (indicated by red boxes, fig. S6). Because of observed traces, we inferred that double-strand break/homologous repair mechanism caused examined tandem replications.

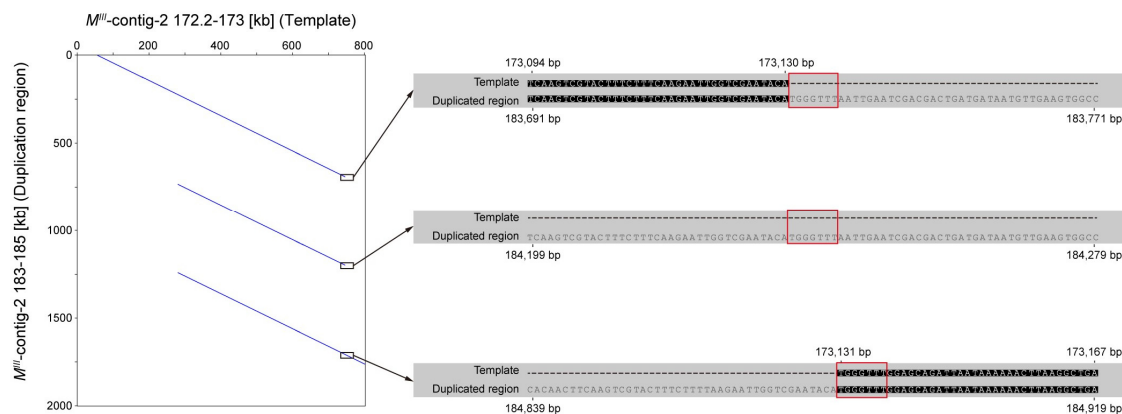

**Supplementary Fig. 6** Alignment of a tandemly duplicated region in comparison to its template sequence on  $M^{III}$ -contig-2. Dotplot visualization demonstrates (on the left) two additional tandem copies in the duplicated region. Pairwise alignment between the template and the duplicated region reveals microhomology traces (indicated by red box), that allows dissociation and upstreams re-invasion.

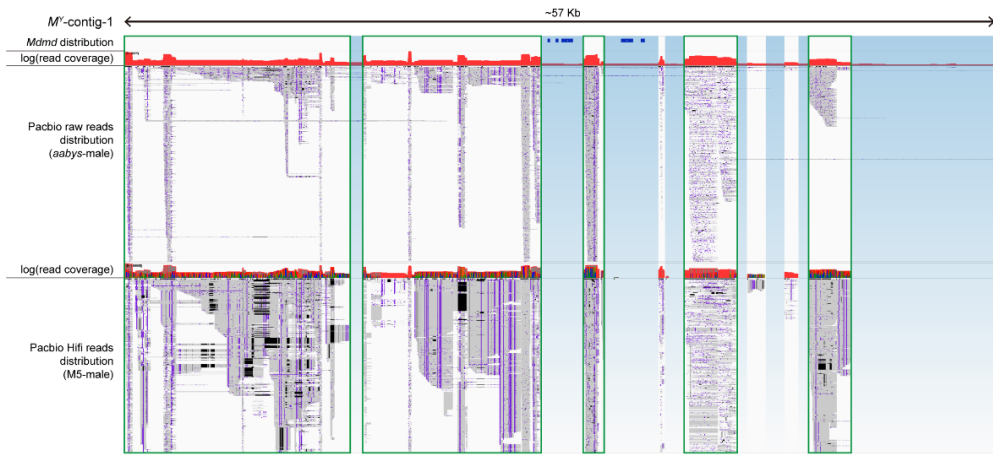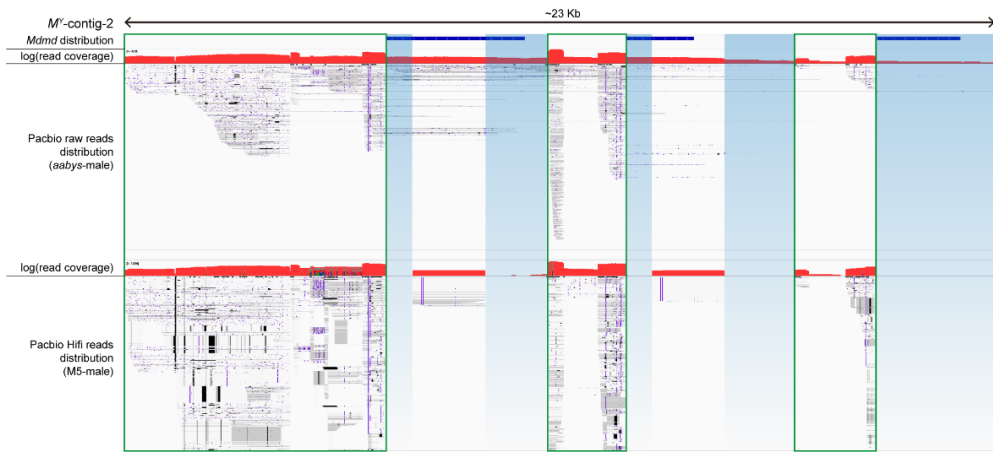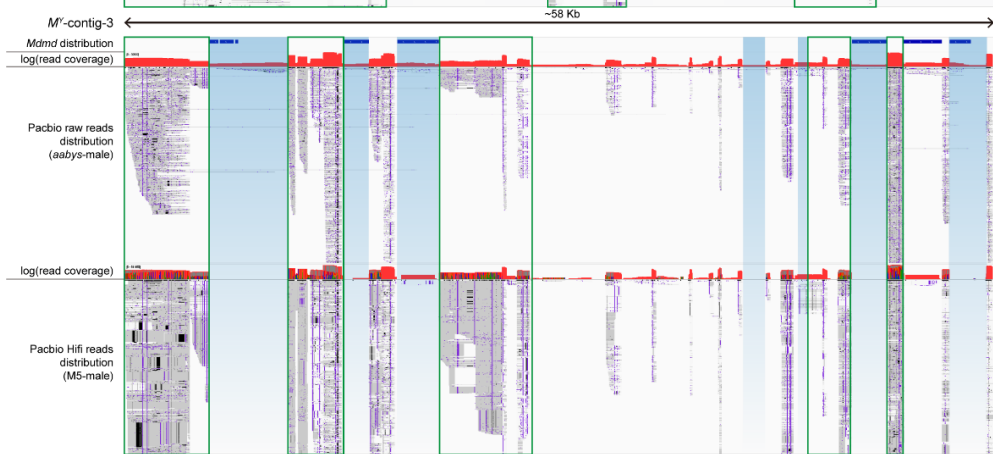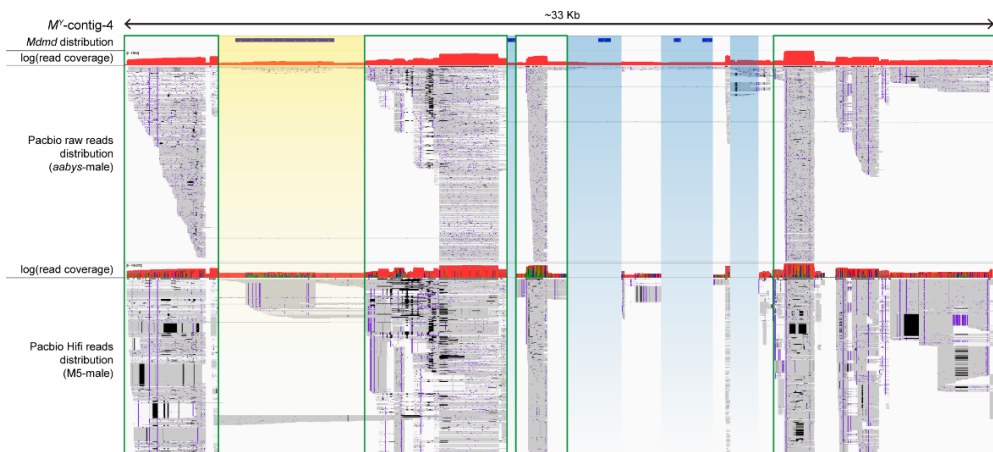

**Supplementary Fig. 7** Mapping Pacbio raw reads of *aabys*-male ( $M^Y$ -containing) and M5-male ( $M^V$ -containing) to  $M^Y$ -contigs. Distribution of *Mdmd* sequences is showed by dark blue blocks in the first track in each figure. Blue shading indicates major  $M^Y$ -specific regions, which only showed coverage in *aabys*-male reads, but not in M5-male reads. Yellow shading indicates the region containing the intact *Mdmd* copy. As  $M^Y$  and  $M^V$  share homology for this region, both *aabys*-male reads and M5-male reads show coverages. Green boxes indicate major regions that show higher coverages than  $M^Y$ -specific regions and are mapped not only by *aabys*-male reads but also by M5-male reads. As  $M^Y$  and  $M^V$ -loci do not share homology for those regions, mapped M5-male reads are likely non-*M*-related sequences, which are potentially homologous sequences on the X chromosome.
