# Supplementary material for: Divergent evolution of male-determining loci on proto-Y chromosomes of the housefly
Source: PubMed Central journal article supplement (PMC11252125; doi:10.1038/s41467-024-50390-1), 2024-07-16
Supplement: 41467_2024_50390_MOESM4_ESM.pdf [file 41467_2024_50390_MOESM4_ESM.pdf]

## Description of Additional Supplementary Files

File Name: Supplementary Data 1

Description: Identified *Mdmd*-like sequences in the *M<sup>III</sup>*-contigs using the sequence of the complete *Mdmd* gene with Blast. The sequences are designated different *Mdmd* copies based on the sequence continuity on the contigs.

File Name: Supplementary Data 2

Description: Summary of repeats inserted within *Mdmd* copies in the *M<sup>III</sup>*-contigs.
